1 **Title Page**

2

3 **Title: Pre-Diagnosis Dietary Patterns and Risk of Multiple Myeloma in the NIH-AARP Diet and**  
4 **Health Study**

5

6 Authors: Francesca Castro<sup>a\*</sup>, Richa Parikh<sup>b\*</sup>, Jelyn C. Eustaquio<sup>c</sup>, Andriy Derkach<sup>d</sup>, Janine M.  
7 Joseph<sup>e</sup>, Alexander M. Lesokhin<sup>a,f</sup>, Saad Z. Usmani<sup>a,f</sup>, Urvi A. Shah<sup>a,f</sup>

8

9 <sup>a</sup>Myeloma Service, Department of Medicine, Memorial Sloan Kettering Cancer Center

10 <sup>b</sup>Department of Hematology/Oncology, Karmanos Cancer Institute, Wayne State University,  
11 Detroit, MI

12 <sup>c</sup>Jacobs School of Medicine and Biomedical Science, University at Buffalo

13 <sup>d</sup>Department of Epidemiology and Biostatistics, Memorial Sloan Kettering Cancer Center

14 <sup>e</sup>Department of Cancer Prevention and Control, Roswell Park Comprehensive Cancer Center

15 <sup>f</sup>Department of Medicine, Weill Cornell Medical College

16

17 \*These authors contributed equally to this work

18 Corresponding Author:

19 Urvi A. Shah, MD

20 530 E 74th St,

21 New York, NY 10021.

22 Phone: 646-608-3713

23 Email address: [shahu@mskcc.org](mailto:shahu@mskcc.org)

24

## 25 **Competing Interests**

26 U.A. Shah reports research funding support from Celgene/BMS, Janssen, Plantable, Sabinsa

27 pharmaceuticals, VeggieDoctor and M and M labs to the institution, non-financial research

28 support; personal fees from ACCC, MashUp MD, Janssen Biotech, Sanofi, BMS, MJH

29 LifeSciences, Intellisphere, Phillips Gilmore Oncology Communications, i3 Health and RedMedEd

30 outside the submitted work. A.M. Lesokhin reports grants from Bristol Myers Squibb and

31 Genentech; grants, personal fees, and non-financial support from Pfizer; and grants and

32 personal fees from Janssen outside the submitted work. A.M. Lesokhin has a patent for

33 US20150037346A1 licensed and with royalties paid from Serametrix, Inc. S. Z. Usmani reports

34 grants/personal fees from Amgen, Celgene, Sanofi, Seattle Genetics, Janssen, Takeda,

35 SkylineDx, Netherlands; Merck, and GSK; grant funding from Bristol Myers Squibb and

36 Pharmacyclics; and personal fees from AbbVie, MundiPharma, Gilead, Genentech, and

37 Oncopeptides. No disclosures were reported by the other authors.

38

39

## 40 **Keywords**

41 Multiple Myeloma, Diet, Dietary Pattern, Nutrition, Plasma cell disorders

42

43

44

45 **Abstract**

46 **Background:** Despite patient interest in knowing whether diet is linked to multiple myeloma  
47 (MM), there is limited research on dietary patterns and MM risk. Two studies have assessed  
48 this risk, albeit with a small number of MM cases. The EPIC-Oxford cohort and Oxford  
49 Vegetarian study (65 MM cases) showed that fish eaters, vegetarians and vegans had  
50 significantly reduced MM risk compared to meat eaters. The Nurses' Health Study and Health  
51 Professionals Follow-up Study (478 MM cases) showed a significantly increased MM risk in men  
52 with Empirical Dietary Inflammatory Pattern.

53 **Methods:** The NIH-AARP Diet and Health study is a prospective cohort of 567,169 persons who  
54 completed a food frequency questionnaire in 1995-1996 and were followed until December  
55 2011. Healthy Eating Index-2015 (HEI-2015), Healthy Diet Score (HDS), alternate Mediterranean  
56 Diet (aMED) and healthful Plant-based Diet Index (hPDI) scores were calculated using *a*  
57 *priori* defined methods and grouped into quartiles, with higher scores reflecting healthier  
58 eating patterns. We prospectively evaluated the association between pre-diagnosis dietary  
59 patterns and MM incidence in this cohort. Hazard ratios (HR) and 95% confidence intervals  
60 (95%CI) were estimated using multivariate Cox proportional hazards models adjusted for age at  
61 study entry, sex, race, body mass index, education, and total energy intake (by residual  
62 method). Sensitivity analysis was conducted to assess reverse causality by excluding MM cases  
63 diagnosed within one year of follow-up.

64 **Results:** Among 392,589 participants (after exclusions), a total of 1,366 MM cases (59% males;  
65 92% non-Hispanic whites) were identified during the follow-up period. Analysis revealed a  
66 significant association between hPDI scores and reduced MM risk (highest vs lowest quartile,

67 HR 0.85; 95%CI 0.73-1.0; p=0.043) (Table). In sensitivity analysis (1,302 MM cases), the  
68 association was no longer significant (HR 0.87; 95%CI 0.74-1.03; p 0.09) but trended in the same  
69 direction. This may be due to small sample size, given MM is a rare disease. HEI-2015, HDS and  
70 aMED scores were not associated with MM risk.

71 **Conclusions:** A healthful plant-based diet was associated with reduced MM risk in the NIH-  
72 AARP cohort. These results will help oncologists and patients make informed choices about  
73 their diet. To our knowledge, this is the largest epidemiologic study to date assessing pre-  
74 diagnosis dietary patterns and MM risk.

75

76

77

78

79

80

81

82

83

84

85

86

87

88

89 **Manuscript**

90 The incidence of multiple myeloma (MM), the second most common hematologic malignancy,  
91 is rising globally [1]. Therefore, research efforts focused on identifying risk factors to reduce risk  
92 of MM are essential. Several risk factors have been identified, some that are non-modifiable  
93 (older age, male sex, African American race) and others that are modifiable (obesity, dietary  
94 patterns, diabetes mellitus). Additionally, amongst 421 patients with plasma cell disorders, 82%  
95 had questions about their diet and 57% reported their questions were not addressed by their  
96 oncologists. Among those who received dietary guidance from their oncologists, 94%  
97 attempted to follow it [2].

98

99 Despite this, there is limited data on dietary patterns and MM risk with few MM cases in each  
100 study. The EPIC-Oxford cohort and Oxford Vegetarian study (65 MM cases) showed vegetarians  
101 and vegans had 77% lower relative risk to develop MM than meat eaters [Relative risk (RR)  
102 0.23, 95% confidence interval (95%CI) 0.09-0.59] [3]. The Nurses' Health Study and Health  
103 Professionals Follow-up Study (478 MM cases) showed the Empirical Dietary Inflammatory  
104 Pattern had a 16% increased MM risk in men [Hazard Ratio (HR) 1.16, 95%CI 0.96-1.24] [4].

105

106 Therefore, we evaluated the association between pre-diagnosis dietary patterns and MM risk in  
107 the NIH-AARP Diet and Health Study, a large population-based, prospective cohort study. To  
108 our knowledge, this is also the largest epidemiologic study on diet and MM risk to date with 1  
109 366 MM cases.

110

111 In 1995-1996, a food frequency questionnaire was mailed to 3.5 million American Association  
112 of Retired Persons (AARP) members who were aged 50–71 years, residents of six US states  
113 (California, Florida, Louisiana, New Jersey, North Carolina, and Pennsylvania) or two  
114 metropolitan areas (Atlanta and Detroit) [5]. A total of 566 398 satisfactorily completed  
115 questionnaires were returned between October 1995 and February 1997. Records were  
116 excluded from our analysis if they were completed in duplicate (n=179), questionnaire was  
117 completed by a proxy respondent (n=15 760) or proxy variable was not available or unknown  
118 (56 134), or if the participant died or moved out of the study area before returning the  
119 questionnaire (n=582), withdrew from the study (n=1), had a history of cancer as determined  
120 by self-report or confirmed from registry data (n=77 805), had a cancer diagnosis date prior to  
121 enrollment (n=1 564) and or had implausible energy intake (<800 or >4200 kcal/d for men and  
122 <600 or >3500 kcal/d for women) (n=20 967). After these exclusions, our final baseline cohort  
123 included 392 589 participants.

124  
125 Study participants were followed from the date the questionnaire was received until first  
126 cancer diagnosis or until participant moved out of study area or died or follow-up period ended  
127 on December 31, 2011. Incident MM cases were identified through linkage to state cancer  
128 registries. Case ascertainment has been estimated to be about 90% complete [6]. MM cases  
129 were defined per International Classification of Diseases for Oncology, Third Edition code (ICD-  
130 O-3).

131

132 In this analysis, we used four dietary indices – Healthy Eating Index-2015 (HEI-2015), Healthy  
133 Diet Score (HDS), alternate Mediterranean Diet (aMED), and healthful Plant-based Diet Index  
134 (hPDI), to assess diet quality. Many of these scores have been inversely associated with cancer  
135 risk and cancer mortality. However, these pre-diagnosis scores have not been evaluated for  
136 MM risk. Using MyPyramid Equivalents Database and other variables, we were able to calculate  
137 each component and index scores for aMED and hPDI, while the HEI-2015 and HDS scores were  
138 previously calculated and provided in the database. These scores were grouped into quartiles.  
139 Higher scores imply higher adherence and a healthier diet.

140

141 The HEI-2015 is a measure of diet quality and overall alignment with the U.S. Dietary Guidelines  
142 for Americans and uses an energy-adjusted density approach for calorie adjustment [7]. There  
143 are nine adequacy components including total fruits, whole fruits, total vegetables, greens and  
144 beans, whole grains, dairy, total protein foods, seafood and plant proteins, and fatty acids.  
145 There are four moderation components including refined grains, sodium, added sugars, and  
146 saturated fats. The HEI score ranges from 0-100.

147

148 The HDS was adapted from the Healthy Diet Indicator which was based on World Health  
149 Organization recommendations [8]. It comprises of 12 components, saturated fatty acids,  
150 polyunsaturated fatty acids, protein, total carbohydrates, dietary fiber, fruit and vegetables,  
151 pulses and nuts, total non-milk extrinsic sugars, cholesterol, fish, red meat and meat products  
152 and calcium. Participants scored 0 or 1 based on their intake of each of these 12 items. The  
153 highest score is 11 [8].

154

155 The aMED score [9] was adapted from the traditional Mediterranean diet score [10] to assesses  
156 the conformity with the Mediterranean dietary pattern. The traditional Mediterranean Diet  
157 score was based on intake of nine components - vegetables, legumes, fruit and nuts, dairy,  
158 cereals, meat and meat products, fish, alcohol and the ratio of monounsaturated to saturated  
159 fat [10]. Intakes above the median received 1 point, all other intakes received 0 points. Meat  
160 and dairy product consumption less than median received 1 point. The aMED score excluded  
161 potato products from the vegetable group, separated fruit and nuts into 2 groups, eliminated  
162 the dairy group, included whole-grain products only, included only red and processed meats for  
163 the meat group and assigned alcohol intake between 5 and 15g/d for 1 point [9]. Scores ranged  
164 from 0 to 9.

165

166 The overall plant-based diet index (PDI) and hPDI were developed by splitting 18 dietary  
167 components into three groups: healthful plant foods (vegetables, whole grains, fruits, legumes,  
168 nuts, vegetable oils, tea/coffee), unhealthful plant foods (fruit juices, refined grains, potatoes,  
169 sugar sweetened beverages, sweets/desserts), and animal foods [11]. We utilized the hPDI, in  
170 which the highest score was given to the highest quintile of intake for each healthful food  
171 group available, and the lowest score given to the highest quintile of intake for unhealthful  
172 plant foods and animal foods available.

173

174 HR and 95%CI for MM risk in highest versus lowest quartiles of dietary index scores were  
175 estimated using multivariate Cox proportional hazards models with person-years as the



176 underlying time metric. The models were adjusted for age at study entry, sex, race (non-  
177 Hispanic Whites, non-Hispanic Blacks, other minority), body mass index (BMI) (<18.5, 18.5-24.9,  
178 25-29.9, 30-34.9,  $\geq 35$ ), and education (less than high school, high school, post-high school  
179 training/college and unknown). Dietary variables were energy adjusted by residual method.  
180 Sensitivity analysis was conducted to assess reverse causality by excluding MM cases diagnosed  
181 within one year of follow-up.

182

183 Among 392,589 participants, 58.6% were males, 92.1% were non-Hispanic Whites, 34.4% had a  
184 normal BMI and 5.4% completed less than high school (Table 1). A total of 1 366 MM cases  
185 were identified during median follow-up period of 15.6 years. Multivariate analysis revealed a  
186 statistically significant inverse association between hPDI scores and MM risk (Q4 vs Q1, HR  
187 0.85, 95%CI 0.73-1.0,  $p=0.043$ ) (Table 2). There was no significant association between HEI-2015  
188 ( $p=0.206$ ), HDS ( $p=0.454$ ), aMED ( $p=0.594$ ) scores and MM risk. In a sensitivity analysis (1 302  
189 MM cases), hPDI was associated with similar reduced MM risk statistical significance was not  
190 achieved (HR 0.87, 95%CI 0.74-1.03,  $p=0.09$ ).

191

192 In this large prospective analysis of the NIH-AARP Diet and Health Study, we found that higher  
193 hPDI scores were associated with a reduced MM risk. HEI-2015, HDS and aMED scores were not  
194 significantly associated with MM risk. Our findings confirm the observations from the EPIC-  
195 Oxford and Oxford-Vegetarian study [3]. The Nurses' Health Study and Health Professionals  
196 Follow-up Study cohorts demonstrated 15-24% lower MM-specific mortality for presumed  
197 healthy pre-diagnosis plant-based dietary patterns [Alternate HEI (AHEI-2010), aMED, dietary

198 approaches to stop hypertension (DASH and Prudent)] [HR range 0.76-0.85 per 1-standard  
199 deviation (SD) increase in scores] and a 16-24% higher MM-specific mortality in unhealthy pre-  
200 diagnosis dietary patterns (Western and inflammatory/insulinemic dietary patterns) (HR range  
201 1.16-1.24, per 1-SD increase in scores) [12]. These findings also suggest that healthy pre-  
202 diagnosis dietary habits may reduce risk of death once MM develops.

203

204 Plant-based diets are rich in fiber and phytochemicals and are associated with reduced cancer  
205 risk and improved survival in cancer through multiple mechanisms such as improved BMI,  
206 decreased inflammation, decreased insulin levels, decreased insulin-like growth factor 1 and  
207 improved stool microbiome [13]. As the role of gut dysbiosis is being increasingly recognized in  
208 the pathogenesis of MM, diet, the largest driver of microbiome composition can no longer be  
209 ignored [14]. Preliminary results of a pilot nutrition-based intervention study (NUTRIVENTION)  
210 in individuals with precursor plasma cell disorders and BMI  $\geq 25$  (NCT04920084) show that a  
211 plant-based diet is feasible and leads to improvement in biomarkers associated with  
212 progression to MM such as insulin resistance and gut microbiome composition [15]. A larger  
213 randomized study of a plant-based diet is currently enrolling (NCT05640843) [16].

214

215 The strengths of this study include the large sample size of MM cases and prospective nature of  
216 the study. A limitation of this study is the predominantly White population despite a higher MM  
217 incidence in Blacks. Further studies are warranted to better understand the underlying  
218 molecular and biological mechanisms.

219

220 In conclusion, the findings of this largest dietary epidemiologic study in MM are highly  
221 suggestive of a reduced MM risk with a healthful plant-based diet. These observations will help  
222 oncologists guide patients to make informed healthy dietary choices.

223

224

## 225 **Acknowledgements**

226 The authors would like to thank the NIH AARP Diet and Health Study Team and Participants.

227 This research was supported [in part] by the Intramural Research Program of the NIH, National

228 Cancer Institute. Cancer incidence data from the Atlanta metropolitan area were collected by

229 the Georgia Center for Cancer Statistics, Department of Epidemiology, Rollins School of Public

230 Health, Emory University, Atlanta, Georgia. Cancer incidence data from California were

231 collected by the California Cancer Registry, California Department of Public Health's Cancer

232 Surveillance and Research Branch, Sacramento, California. Cancer incidence data from the

233 Detroit metropolitan area were collected by the Michigan Cancer Surveillance Program,

234 Community Health Administration, Lansing, Michigan. The Florida cancer incidence data used in

235 this report were collected by the Florida Cancer Data System (Miami, Florida) under contract

236 with the Florida Department of Health, Tallahassee, Florida. The views expressed herein are

237 solely those of the authors and do not necessarily reflect those of the FCDC or FDOH. Cancer

238 incidence data from Louisiana were collected by the Louisiana Tumor Registry, Louisiana State

239 University Health Sciences Center School of Public Health, New Orleans, Louisiana. Cancer

240 incidence data from New Jersey were collected by the New Jersey State Cancer Registry, The

241 Rutgers Cancer Institute of New Jersey, New Brunswick, New Jersey. Cancer incidence data

242 from North Carolina were collected by the North Carolina Central Cancer Registry, Raleigh,  
243 North Carolina. Cancer incidence data from Pennsylvania were supplied by the Division of  
244 Health Statistics and Research, Pennsylvania Department of Health, Harrisburg, Pennsylvania.  
245 The Pennsylvania Department of Health specifically disclaims responsibility for any analyses,  
246 interpretations or conclusions. Cancer incidence data from Arizona were collected by the  
247 Arizona Cancer Registry, Division of Public Health Services, Arizona Department of Health  
248 Services, Phoenix, Arizona. Cancer incidence data from Texas were collected by the Texas  
249 Cancer Registry, Cancer Epidemiology and Surveillance Branch, Texas Department of State  
250 Health Services, Austin, Texas. Cancer incidence data from Nevada were collected by the  
251 Nevada Central Cancer Registry, Division of Public and Behavioral Health, State of Nevada  
252 Department of Health and Human Services, Carson City, Nevada. We are indebted to the  
253 participants in the NIH-AARP Diet and Health Study for their outstanding cooperation. We wish  
254 to acknowledge Dr. Arthur Schatzkin who was instrumental in conceiving and establishing the  
255 NIH-AARP Diet and Health Study. We also thank former and current study leaders at the  
256 National Cancer Institute and AARP, including Louise A. Brinton, Laurence S. Freedman, Albert  
257 R. Hollenbeck, Victor Kipnis, Michael F. Leitzmann, Linda M. Liao, Charles E. Matthews, Yikyung  
258 Park, Rashmi Sinha, Amy F. Subar and Mary H. Ward. Additionally, we are thankful to Sigurd  
259 Hermansen and Kerry Grace Morrissey from Westat for study outcomes ascertainment and  
260 management and Leslie Carroll and her team at Information Management Services for data  
261 support and analysis.  
262

263 This study was funded by the Center for Hematologic Malignancies at MSKCC and in part  
264 through the NIH/NCI Cancer Center Support Grant P30 CA008748. Urvi A. Shah has received the  
265 American Society of Hematology Scholar Award, the NCI MSK Paul Calabresi K12 Career  
266 Development Award for Clinical Oncology K12CA184746, the MSK Parker Institute of Cancer  
267 Immunotherapy CDA and the International Myeloma Society CDA as well as additional funding  
268 support from HealthTree Foundation, the Allen Foundation Inc, the Paula and Rodger Riney  
269 Foundation, the Willow Foundation and the David Drelich, MD, CFP, Irrevocable Trust. U. A.  
270 Shah also received non-financial support from American Society of Hematology Clinical  
271 Research Training Institute and TREC Training Workshop R25CA203650 (PI: Melinda Irwin). A.M.  
272 Lesokhin received research support from NIH/NCI Cancer Center Support Grant P30CA008748,  
273 NCI 1R01CA249981-01, Sawiris Family Fund, and Paula and Rodger Riney Foundation.

274

275

#### 276 **Author Contributions**

277 Concept and design: RP, FC, AD, UAS. Acquiring data: RP, FC, AD, UAS. Analyzing data: RP, FC,  
278 AD, JE, JMJ, UAS. Drafting the manuscript: RP, FC, JE, UAS. Critical revision of the manuscript:  
279 FC, RP, JMJ, AML, SZU, UAS. Approving the final version of the paper: FC, RP, JE, AD, JMJ, AML,  
280 SZU and UAS. Submission: RP and UAS. RP and FC contributed equally to this work. All authors  
281 agreed to be accountable for all aspects of the work in ensuring that questions related to the  
282 accuracy or integrity of any part of the work are appropriately investigated and resolved.

283

284

285 **Data Availability**

286 The data that support the findings of this study are available from the NIH-AARP Diet and  
287 Health Study, but restrictions apply to the availability of these data, which were used under  
288 license for the current study, and so are not publicly available. Data are however available from  
289 the authors upon reasonable request and with permission of the NIH-AARP Diet and Health  
290 Study team.

291

292

293

294

295

296

297

298

299

300

301

302

303

304

305

306

## 307 References

- 308 1. Huang, J., et al., *The epidemiological landscape of multiple myeloma: a global cancer*  
309 *registry estimate of disease burden, risk factors, and temporal trends*. *Lancet Haematol*,  
310 2022. **9**(9): p. e670-e677.
- 311 2. Malik, M.A., et al., *Nutrition perceptions, needs and practices among patients with*  
312 *plasma cell disorders*. *Blood Cancer J*, 2022. **12**(4): p. 70.
- 313 3. Key, T.J., et al., *Cancer in British vegetarians: updated analyses of 4998 incident cancers*  
314 *in a cohort of 32,491 meat eaters, 8612 fish eaters, 18,298 vegetarians, and 2246*  
315 *vegans*. *Am J Clin Nutr*, 2014. **100 Suppl 1**(1): p. 378s-85s.
- 316 4. Lee, D.H., et al., *Dietary Pattern and Risk of Multiple Myeloma in Two Large Prospective*  
317 *US Cohort Studies*. *JNCI Cancer Spectr*, 2019. **3**(2): p. pkz025.
- 318 5. Schatzkin, A., et al., *Design and serendipity in establishing a large cohort with wide*  
319 *dietary intake distributions : the National Institutes of Health-American Association of*  
320 *Retired Persons Diet and Health Study*. *Am J Epidemiol*, 2001. **154**(12): p. 1119-25.
- 321 6. Michaud, D., et al., *Comparison of cancer registry case ascertainment with SEER*  
322 *estimates and self-reporting in a subst of the NIH-AARP Diet and Health Study*. *J Registry*  
323 *Manag*, 2005. **32**: p. 70-75.
- 324 7. Krebs-Smith, S.M., et al., *Update of the Healthy Eating Index: HEI-2015*. *J Acad Nutr Diet*,  
325 2018. **118**(9): p. 1591-1602.
- 326 8. Maynard, M., et al., *Selecting a healthy diet score: lessons from a study of diet and*  
327 *health in early old age (the Boyd Orr cohort)*. *Public Health Nutr*, 2005. **8**(3): p. 321-6.

- 328 9. Fung, T.T., et al., *Diet-quality scores and plasma concentrations of markers of*  
329 *inflammation and endothelial dysfunction*. Am J Clin Nutr, 2005. **82**(1): p. 163-73.
- 330 10. Trichopoulou, A., et al., *Adherence to a Mediterranean diet and survival in a Greek*  
331 *population*. N Engl J Med, 2003. **348**(26): p. 2599-608.
- 332 11. Satija, A., et al., *Plant-Based Dietary Patterns and Incidence of Type 2 Diabetes in US*  
333 *Men and Women: Results from Three Prospective Cohort Studies*. PLoS Med, 2016. **13**(6):  
334 p. e1002039.
- 335 12. Lee, D.H., et al., *Prediagnosis dietary pattern and survival in patients with multiple*  
336 *myeloma*. Int J Cancer, 2020. **147**(7): p. 1823-1830.
- 337 13. Shah, U.A. and N.M. Iyengar, *Plant-Based and Ketogenic Diets As Diverging Paths to*  
338 *Address Cancer: A Review*. JAMA Oncol, 2022. **8**(8): p. 1201-1208.
- 339 14. Shah, U.A., et al., *Dietary and microbiome evidence in multiple myeloma and other*  
340 *plasma cell disorders*. Leukemia, 2023.
- 341 15. Shah, U.A., et al., *A Pilot Plant Based Dietary Intervention in MGUS and SMM Patients*  
342 *with Elevated BMI Is Feasible and Associated with Improvements in Metabolic and*  
343 *Microbiome Biomarkers of Progression*. Blood, 2022. **140**(Supplement 1): p. 5066-5069.
- 344 16. Shah, U.A., et al., *A Randomized Placebo Controlled Study of a Plant-Based Dietary*  
345 *Versus Supplement Versus Placebo Intervention in Patients with Monoclonal*  
346 *Gammopathy of Undetermined Significance (MGUS) and Smoldering Multiple Myeloma*  
347 *(SMM) - the Nutrition Prevention (NUTRIVENTION-3) Study*. Blood, 2022.  
348 **140**(Supplement 1): p. 5052-5055.
- 349



| <b>Table 1: Baseline characteristics of study cohort</b>               |                             |                                  |
|------------------------------------------------------------------------|-----------------------------|----------------------------------|
|                                                                        | <b>Overall (N= 392,589)</b> | <b>Multiple Myeloma (N=1366)</b> |
| <b>Age at Entry</b>                                                    |                             |                                  |
| >60                                                                    | 229,032 (58%)               | 952 (70%)                        |
| 45-60                                                                  | 163,557 (42%)               | 414 (30%)                        |
| <b>Sex</b>                                                             |                             |                                  |
| Male                                                                   | 230,130 (59%)               | 961 (70%)                        |
| Female                                                                 | 162,459 (41%)               | 405 (30%)                        |
| <b>Race</b>                                                            |                             |                                  |
| Non-Hispanic White                                                     | 361,486 (92%)               | 1,216 (89%)                      |
| Non-Hispanic Black                                                     | 13,714 (4%)                 | 94 (7%)                          |
| Hispanic/Asian/Pacific Islander/American Indian/Alaskan Native/Unknown | 17,389 (4%)                 | 56 (4%)                          |
| <b>Body Mass Index</b>                                                 |                             |                                  |
| <18.5                                                                  | 3,935 (1%)                  | 11 (1%)                          |
| 18.5-25                                                                | 134,997 (34%)               | 420 (31%)                        |
| 25-30                                                                  | 16,3455 (42%)               | 609 (45%)                        |
| 30-35                                                                  | 59,669 (15%)                | 227 (17%)                        |
| >35                                                                    | 23,645 (6%)                 | 75 (5%)                          |
| <b>Education</b>                                                       |                             |                                  |
| Less than high school                                                  | 21,231 (5%)                 | 74 (5%)                          |
| Completed high school                                                  | 75,189 (19%)                | 248 (18%)                        |
| Post-high school training/ College/Postgraduate                        | 286,512 (73%)               | 1,019 (75%)                      |
| Unknown                                                                | 9,657 (3%)                  | 25 (2%)                          |

350

351

352

| <b>Table 2: Cox multivariate analysis for dietary pattern scores in quartiles and MM risk</b>                                                                                |           |                   |                   |                          |                |
|------------------------------------------------------------------------------------------------------------------------------------------------------------------------------|-----------|-------------------|-------------------|--------------------------|----------------|
| <b>Dietary Score</b>                                                                                                                                                         | <b>Q1</b> | <b>Q2</b>         | <b>Q3</b>         | <b>Q4</b>                | <b>p-value</b> |
| HEI-2015                                                                                                                                                                     | 1         | 1.15 (0.99, 1.34) | 1.01 (0.87, 1.18) | 1.01 (0.87, 1.19)        | 0.2055         |
| HDS                                                                                                                                                                          | 1         | 0.95 (0.81, 1.10) | 0.88 (0.76, 1.03) | 0.92 (0.79, 1.07)        | 0.4537         |
| aMED                                                                                                                                                                         | 1         | 1.02 (0.89, 1.18) | 1.0 (0.87, 1.16)  | 0.92 (0.79, 1.07)        | 0.5942         |
| <b>hPDI</b>                                                                                                                                                                  | 1         | 1.02 (0.88, 1.17) | 1.05 (0.9, 1.23)  | <b>0.85 (0.73, 1.00)</b> | <b>0.0429*</b> |
| Hazard Ratio (95% confidence interval)                                                                                                                                       |           |                   |                   |                          |                |
| *Statistically significant                                                                                                                                                   |           |                   |                   |                          |                |
| MM: Multiple myeloma; HEI-2015: Healthy Eating Index-2015; HDS: Healthy Diet Score; aMED: alternate Mediterranean Diet; hPDI: healthful Plant-based Diet Index; Q: Quartile. |           |                   |                   |                          |                |

353
